# Supplementary material for: Hospital admission from the emergency department for selected emergent diagnoses during the first year of the COVID-19 pandemic in Ontario: a retrospective population-based study
Source: PubMed Central journal article supplement — CMAJ Open. 2023 Oct 24;11(5):E969–81. doi: 10.9778/cmajo.20230017 (PMC10609908; doi:10.9778/cmajo.20230017), 2023-10-24
Supplement: open-2023-0017-1-at.pdf [file open-2023-0017-1-at.pdf]

## Supplementary Material

**Methods.** Additional information regarding data sources and covariates

**Table e1:** Description of which databases variables were extracted from

**Table e2:** ICD-10 codes to identify emergent diagnoses

**Table e3:** Validated algorithms for comorbidities

**Table e4:** Codes to identify other comorbidities/covariates

**Table e5:** Overall and cohort exclusions for each year

### METHODS:

#### Data Sources

ED visits were identified from the Canadian Institutes of Health Information National Ambulatory Care Reporting System (CIHI-NACRS). NACRS is an administrative database that contains anonymized, abstracted data on all ED patient visits in the province of Ontario; it contains over 300 data points on every ED visit. Reporting to NACRS is mandatory in Ontario. Data in NACRS are reviewed and errors and/or missing data are identified, and returned to the submitting hospital as necessary for resubmission; therefore, missing data for mandatory variables in NACRS is very low.

#### Study Participants

The main discharge diagnosis in NACRS, which uses ICD-10 codes, was used to identify patients with the diagnoses of interest. See Table e1 for the ICD-10 codes used to identify each of the five emergent diagnoses.

#### Covariates

Where available, validated algorithms were used to identify patient risk factors and comorbidities in the linked databases. See Table e2 for previously validated algorithms to identify comorbidities with ICES data. Where validated algorithms were not available, the patient was considered to have a past medical history of the disease in question if they had, within the 5 years prior to the ED visit, one diagnosis in the DAD, or two outpatient diagnoses in the OHIP databases, or two main diagnoses in NACRS, or one each from NACRS and the OHIP database. This approach is a similar strategy used in many of the validated algorithms. See Table e3 for codes to identify other comorbidities. To identify patients with a history of cancer, the Ontario Cancer Registry (OCR) was used. The OCR is a registry that contain all the diagnosed cases of cancer (except squamous and basal cell carcinoma) in the province. To examine rurality, the Rural Index of Ontario (RIO) score was used. The RIO score is a continuous score calculated by Statistics Canada, and is assigned to each patient based on postal code.<sup>5</sup> The score incorporates: population density, distance to basic referral centre, and distance to advanced referral centre. A higher RIO score is indicative of a more rural area, with scores greater than 40 considered to be rural based on funding models by the Ministry of Health and Long Term Care. The John Hopkins Adjusted Clinical Group (ACG) case-mix system is a measure of patient acuity/comorbidity. Diagnoses are assigned to one of 32 diagnostic cluster (Adjusted Diagnostic Groups (ADG); patients with the greatest number of high-risk clusters are generally sickest and require the most health care resources. In an ambulatory cohort, the ADG score is similar in principle to the use of Charlson Comorbidity Index in studies of hospitalized patients. Hospital type was categorized as “academic”, “community”, or “small”, based on government classifications.

**Table e1: Description of which databases variables were extracted from**

| Database                                          | Description                                                              | Data                                                                                                                        |
|---------------------------------------------------|--------------------------------------------------------------------------|-----------------------------------------------------------------------------------------------------------------------------|
| Discharge Abstract Database (DAD)                 | Acute care hospitalization                                               | <ul style="list-style-type: none"> <li>- Hospitalizations</li> <li>- In-patient surgery</li> <li>- Comorbidities</li> </ul> |
| National Ambulatory Care Reporting System (NACRS) | Emergency department visits                                              | <ul style="list-style-type: none"> <li>- ED visits</li> <li>- Comorbidities</li> </ul>                                      |
| Ontario Cancer Registry (OCR)                     | All diagnosed cases of cancer (except basal and squamous cell carcinoma) | <ul style="list-style-type: none"> <li>- Cancer</li> </ul>                                                                  |
| Ontario Health Insurance Plan (OHIP) database     | Physician billings for medically necessary care                          | <ul style="list-style-type: none"> <li>- Comorbidities</li> </ul>                                                           |
| Registered Persons Database                       | Demographic and mortality data for Ontario residents                     | <ul style="list-style-type: none"> <li>- Demographics</li> <li>- Mortality</li> </ul>                                       |
| Same Day Surgery database                         | Outpatient surgical procedures                                           | <ul style="list-style-type: none"> <li>- Outpatient surgery</li> </ul>                                                      |

**Table e2: ICD-10 codes in the main discharge diagnosis in CIHI-NACRS to identify emergent diagnoses**

| Diagnosis                  | ICD-10 Code                                                                                                                                                                                                                                                                                                           | Description                                         |
|----------------------------|-----------------------------------------------------------------------------------------------------------------------------------------------------------------------------------------------------------------------------------------------------------------------------------------------------------------------|-----------------------------------------------------|
| <b>Acute appendicitis</b>  | K35                                                                                                                                                                                                                                                                                                                   | Acute appendicitis                                  |
|                            | K350                                                                                                                                                                                                                                                                                                                  | Acute appendicitis with generalized peritonitis     |
|                            | K351                                                                                                                                                                                                                                                                                                                  | Acute appendicitis with peritoneal abscess          |
|                            | K352                                                                                                                                                                                                                                                                                                                  | Acute appendicitis with generalized peritonitis     |
|                            | K353                                                                                                                                                                                                                                                                                                                  | Acute appendicitis with localized peritonitis       |
|                            | K358                                                                                                                                                                                                                                                                                                                  | Acute appendicitis, other and unspecified           |
|                            | K359                                                                                                                                                                                                                                                                                                                  | Acute appendicitis, unspecified                     |
| <b>Ectopic pregnancy</b>   | O00                                                                                                                                                                                                                                                                                                                   | Ectopic Pregnancy                                   |
|                            | O000                                                                                                                                                                                                                                                                                                                  | Abdominal pregnancy                                 |
|                            | O001                                                                                                                                                                                                                                                                                                                  | Tubal pregnancy                                     |
|                            | O002                                                                                                                                                                                                                                                                                                                  | Ovarian pregnancy                                   |
|                            | O008                                                                                                                                                                                                                                                                                                                  | Other ectopic pregnancy                             |
|                            | O009                                                                                                                                                                                                                                                                                                                  | Ectopic pregnancy, unspecified                      |
| <b>Hyperkalemia</b>        | E875                                                                                                                                                                                                                                                                                                                  | Hyperkalaemia                                       |
| <b>Acute Renal Failure</b> | E102, E112, E132, E142, I12, I13, N01.*, N03.*, N05.*, N08.*, N18.*, N19.*, N25.* with dialysis<br>OHIP: R849, R850, G323, G325, G326, G330, G331, G860, G333, G083, G091, G085, G295, G082, G090, G092, G093, G094, G861, G862, G863, G864, G865, G866, G294, G095, G096 CCP: 51.95, 66.98 CCI: 1PZ21HQBR, 1PZ21HPD4 |                                                     |
| <b>DKA</b>                 | E10.0*                                                                                                                                                                                                                                                                                                                | Type 1 diabetes mellitus with coma                  |
|                            | E10.1*                                                                                                                                                                                                                                                                                                                | Type 1 diabetes mellitus with ketoacidosis          |
|                            | E11.0*                                                                                                                                                                                                                                                                                                                | Type 2 diabetes mellitus with coma                  |
|                            | E11.1*                                                                                                                                                                                                                                                                                                                | Type 2 diabetes mellitus with ketoacidosis          |
|                            | E13.0*                                                                                                                                                                                                                                                                                                                | Other specified diabetes mellitus with coma         |
|                            | E13.1*                                                                                                                                                                                                                                                                                                                | Other specified diabetes mellitus with ketoacidosis |
|                            | E14.0*                                                                                                                                                                                                                                                                                                                | Unspecified diabetes mellitus with coma             |
|                            | E14.1*                                                                                                                                                                                                                                                                                                                | Unspecified diabetes mellitus with ketoacidosis     |
| <b>Cellulitis</b>          | L03*                                                                                                                                                                                                                                                                                                                  | Cellulitis                                          |

**Table e3: Validated algorithms for comorbidities**

| Comorbidity  | Sensitivity % | Specificity % | Reference |
|--------------|---------------|---------------|-----------|
| CAD          | 88.8          | 92.8          | 1         |
| CHF          | 84.8          | 97.0          | 2         |
| COPD         | 57.5          | 95.4          | 3         |
| Diabetes     | 86.0          | 97.0          | 5         |
| Hypertension | 73.0          | 95.0          | 6         |

CAD: coronary artery disease; CHF: congestive heart failure; COPD: chronic pulmonary obstructive disease

**References:**

- 1) Austin PC, Daly PA, Tu JV. A multicenter study of the coding accuracy of hospital discharge administrative data for patients admitted to cardiac care units in Ontario. *Am Heart J.* 2002;144(2):290-296.
- 2) Schultz SE, Rothwell DM, Chen Z, Tu K. Identifying cases of congestive heart failure from administrative data: A validation study using primary care patient records. *Chronic Dis Injuries in Canada.* 2013;33(3):160-6.
- 3) Gershon AS, Wang C, Guan J, Vasilevska-Ristovska J, Cicutto L, To T. Identifying individuals with physician diagnosed COPD in health administrative databases. *COPD.* 2009;6(5):388.
- 4) Jaakkimainen RL, Bronskill SE, Tierney MC, et al. Identification of Physician-Diagnosed Alzheimer's Disease and Related Dementias in Population-Based Administrative Data: A Validation Study Using Family Physicians' Electronic Medical Records. *J Alzheimers Dis.* 2016;54(1):337-349.
- 5) Hux JE, Ivis F, Flintoft V, Bica A. Diabetes in Ontario: determination of prevalence and incidence using a validated administrative data algorithm. *Diabetes Care.* 2002;25(3):512.
- 6) Tu K, Campbell NR, Chen ZL, Cauch-Dudek KJ, McAlister FA. Accuracy of administrative databases in identifying patients with hypertension. *Open Medicine.* 2007;1(1):e18.

**Table e4: Codes to identify other comorbidities/covariates**

| <b>Comorbidity</b>    | <b>ICD-10 DX10CODE</b>                    | <b>OHIP DXCODE</b> |
|-----------------------|-------------------------------------------|--------------------|
| Cancer (last 5 years) | OCR                                       | OCR                |
| Renal Failure         | N01.*, N03.*, N05.*, N18.*, N19.**,       | 585, 584           |
| Liver Failure         | K70.4, K72.1, K72.9, K76.6, K76.7,        | 571                |
| Stroke                | I63.*, I64.*, H34.**                      | 436, 437           |
| CAD                   | I20.*, I21.*, I22.*, I23.*, I24.*, I25.** | 410, 412, 413      |

OCR: Ontario Cancer Registry; ALR: Activity Level Reporting database; NDFP = New Drug Funding Program database

**Table e5: Overall and cohort exclusions for each year**

|                                                              | <b>2018</b>            | <b>2019</b>            | <b>2020</b>            | <b>TOTAL</b>            |
|--------------------------------------------------------------|------------------------|------------------------|------------------------|-------------------------|
|                                                              | <b>N=103,764</b>       | <b>N=102,850</b>       | <b>N=87,314</b>        | <b>N=293,928</b>        |
| <b>Overall Exclusions</b>                                    |                        |                        |                        |                         |
| Invalid IKN (not in RPDB)                                    | <=5 (0.0%)             | <=5 (0.0%)             | <=5 (0.0%)             | 10 (0.0%)               |
| Age < 18                                                     | 8,832 (8.5%)           | 9,035 (8.8%)           | 6,226 (7.1%)           | 24,093 (8.2%)           |
| Not OHIP eligible on date of ED visit                        | 145 (0.1%)             | 150 (0.1%)             | 124 (0.1%)             | 419 (0.1%)              |
| Left without seen/ against medical advice                    | 706 (0.7%)             | 775 (0.8%)             | 642 (0.7%)             | 2,123 (0.7%)            |
| Not ON resident                                              | 54 (0.1%)              | 64 (0.1%)              | 75 (0.1%)              | 193 (0.1%)              |
| Problematic dates                                            | <=10 (0.0%)            | <=15 (0.0%)            | <=5 (0.0%)             | 19 (0.0%)               |
| Multiple ED visits (of same diagnoses) within time period    | 18,610 (17.9%)         | 17,634 (17.1%)         | 14,742 (16.9%)         | 50,986 (17.3%)          |
| Included in cohort                                           | <b>75,408 (72.7%)</b>  | <b>75,178 (73.1%)</b>  | <b>65,499 (75.0%)</b>  | <b>216,085 (73.5%)</b>  |
| <b>Appendicitis – Further exclusions</b>                     | N=7,985                | N=8,219                | N=7,781                | N=23,985                |
| Problematic Dates, death before discharge                    | 7 (0.1%)               | 6 (0.1%)               | 10 (0.1%)              | 23 (0.1%)               |
| <b>Included in analysis</b>                                  | <b>7,978 (99.9%)</b>   | <b>8,213 (99.9%)</b>   | <b>7,771 (99.9%)</b>   | <b>23,962 (99.9%)</b>   |
| <b>Ectopic – Further exclusions</b>                          | N< 2,700               | N<2,700                | N<2,700                | N=7,777                 |
| Problematic Dates                                            | <=5 (0.0%)             | <=5 (0.0%)             | <=5 (0.0%)             | <=5 (0.0%)              |
| <b>Included in analysis</b>                                  | <b>2,618 (100.0%)</b>  | <b>2,668 (100.0%)</b>  | <b>2,490 (100.0%)</b>  | <b>7,776 (100.0%)</b>   |
| <b>Acute Renal Failure/Hyperkalemia – Further exclusions</b> | N=4,846                | N=4,732                | N=3,954                | N=13,532                |
| Problematic Dates, death before discharge, missing dates     | 9 (0.2%)               | 9 (0.2%)               | 12 (0.2%)              | 30 (0.2%)               |
| <b>Included in analysis</b>                                  | <b>4,837 (99.8%)</b>   | <b>4,723 (99.8%)</b>   | <b>3,942 (99.7%)</b>   | <b>13,502 (99.8%)</b>   |
| <b>Diabetic Ketoacidosis – Further exclusions</b>            | N< 3,400               | N<3,400                | N<3,400                | N=9,978                 |
| Problematic Dates, death before discharge, missing dates     | <=10 (0.1%)            | <=10 (0.1%)            | <=10 (0.1%)            | 21 (0.2%)               |
| <b>Included in analysis</b>                                  | <b>3,261 (99.7%)</b>   | <b>3,320 (99.8%)</b>   | <b>3,376 (99.9%)</b>   | <b>9,957 (99.8%)</b>    |
| <b>Cellulitis – Further exclusions</b>                       | N=56,688               | N=56,232               | N=47,893               | N=160,813               |
| Problematic Dates, missing dates                             | 9 (0.0%)               | 9 (0.0%)               | 7 (0.0%)               | 25 (0.0%)               |
| <b>Included in analysis</b>                                  | <b>56,679 (100.0%)</b> | <b>56,223 (100.0%)</b> | <b>47,886 (100.0%)</b> | <b>160,788 (100.0%)</b> |

\*some cells <=5 have been suppressed, other cells have been suppressed to prevent back calculation.
