# Supplementary material for: Hospital admission from the emergency department for selected emergent diagnoses during the first year of the COVID-19 pandemic in Ontario: a retrospective population-based study
Source: PubMed Central journal article supplement — CMAJ Open. 2023 Oct 24;11(5):E969–81. doi: 10.9778/cmajo.20230017 (PMC10609908; doi:10.9778/cmajo.20230017), 2023-10-24
Supplement: open-2023-0017-original-submission.pdf [file open-2023-0017-original-submission.pdf]

1  
2  
3  
4 **Emergency department outcomes for emergent diagnoses during the first year of the**  
5 **COVID-19 pandemic: A Canadian population-based study**  
6  
7  
8  
9  
10

11 Keerat Grewal, MD, MSc;<sup>1,2,3</sup> Clare L. Atzema, MD, MSc;<sup>2,3,4</sup> Rinku Sutradhar, PhD;<sup>3,5</sup> Winnie  
12 Yu, MSc;<sup>3</sup> Lucas B. Chartier, MDCM, MPH;<sup>2,6</sup> Steven M. Friedman, MD, MPH;<sup>6,7</sup> Megan  
13 Landes, MD, MSc;<sup>6,7</sup> Bjug Borgundvaag, PhD, MD;<sup>1,7</sup> Shelley L. McLeod, PhD<sup>1,7</sup>  
14  
15  
16  
17

18 <sup>1</sup>Schwartz/Reisman Emergency Medicine Institute, Sinai Health, Toronto, Ontario, Canada

19 <sup>2</sup>Division of Emergency Medicine, Department of Medicine, Temerty Faculty of Medicine,  
20 University of Toronto, Toronto, Ontario, Canada

21 <sup>3</sup>ICES, Toronto, Ontario, Canada

22 <sup>4</sup>Department of Emergency Services, Sunnybrook Health Sciences Centre, Toronto, Ontario,  
23 Canada

24 <sup>5</sup>Dalla Lana School of Public Health, University of Toronto, Toronto, Ontario, Canada

25 <sup>6</sup>Department of Emergency Medicine, University Health Network, Toronto, Ontario, Canada

26 <sup>7</sup>Division of Emergency Medicine, Department of Family and Community Medicine, Temerty  
27 Faculty of Medicine, University of Toronto, Toronto, Ontario, Canada  
28  
29

30  
31 **Corresponding Author:**

32 Keerat Grewal, MD, MSc

33 Schwartz/Reisman Emergency Medicine Institute

34 Sinai Health

35 206-600 University Avenue

36 Toronto, ON M5T3L9

37 Keerat.grewal@sinaihealth.ca

38 T 416-586-4800 x 5959

39 F 416-586-3111  
40  
41

42 **Word Count:** 2464

43 Abstract word count: 486

44 Figures: 1a-e

45 Tables:2

46 Supplementary Material: Included  
47  
48

49 **Key Words:** emergency department; COVID-19; pandemic; outcomes  
50  
51  
52  
53  
54  
55  
56  
57  
58  
59  
60

1  
2  
3 **Funding:** This study received support from the Ontario Health Data Platform (OHDP), a  
4 province of Ontario initiative to support Ontario's ongoing response to COVID-19 and its related  
5 impact.  
6

7  
8 *This study was supported by ICES, which is funded by an annual grant from the Ontario*  
9 *Ministry of Health (MOH) and the Ministry of Long-Term Care (MLTC). Parts of this material*  
10 *are based on data and information compiled and provided by the MOH, MLTC, the Canadian*  
11 *Institute for Health Information (CIHI), and Cancer Care Ontario (CCO). The analyses,*  
12 *conclusions, opinions and statements expressed herein are solely those of the authors and do not*  
13 *reflect those of the funding or data sources; no endorsement is intended or should be inferred.*  
14 *This study was supported by the Ontario Health Data Platform (OHDP), a Province of Ontario*  
15 *initiative to support Ontario's ongoing response to COVID-19 and its related impacts. The*  
16 *opinions, results and conclusions reported in this paper are those of the authors and are*  
17 *independent from the funding sources. No endorsement by the OHDP, its partners, or the*  
18 *Province of Ontario is intended or should be inferred.*  
19  
20

#### 21 **Availability of data and material:**

22 The dataset from this study is held securely in coded form at ICES. While data sharing  
23 agreements prohibit ICES from making the dataset publicly available, access may be granted to  
24 those who meet pre-specified criteria for confidential access, available at [www.ices.on.ca/DAS](http://www.ices.on.ca/DAS).  
25 The full dataset creation plan and underlying analytic code are available from the authors upon  
26 request, understanding that the computer programs may rely upon coding templates or macros  
27 that are unique to ICES and are therefore either inaccessible or may require modification.  
28  
29

#### 30 **Author contributions:**

31 KG, CLA, LC, ML, SF, BB, SLM were involved in study conceptualization. KG, CLA, RS, BB,  
32 SLM were involved in creating the data analysis plan. WL conducted the analysis. All authors  
33 contributed to data interpretation. KG and SLM prepared the first draft of the manuscript and all  
34 authors edited and provided critical feedback to the final manuscript and approved the final  
35 manuscript.  
36  
37

38  
39 **Presentations:** This study was presented at the Canadian Association of Emergency Physicians  
40 Annual Conference, June 1-4, 2022 in Quebec City, Canada.  
41

42 The authors report no conflicts of interest.  
43  
44  
45  
46  
47  
48  
49  
50  
51  
52  
53  
54  
55  
56  
57  
58  
59  
60

## ABSTRACT

**Background:** The indirect effects of acute care avoidance for emergent issues during the beginning of the COVID-19 pandemic have not been explored. We aimed to examine markers of greater illness acuity on emergency department (ED) presentation in patients with non-COVID related emergent diagnoses, and associated outcomes.

**Methods:** Retrospective study using administrative data from Ontario. We selected four emergent diagnoses: appendicitis, ectopic pregnancy, renal failure, diabetic ketoacidosis. A non-emergent diagnosis (cellulitis) was used as a control. Primary outcome of interest was hospital admission. Secondary outcomes were: arrival by ambulance, surgical intervention (for appendicitis and ectopic pregnancy), subsequent return hospital admission, and 30-day mortality. Outcomes during the first year of the pandemic (Mar 15–Dec 31, 2020) were compared to a control period (Mar 15–Dec 31, 2018 and 2019). We conducted multivariable regression to examine outcomes in patients with each diagnosis during the pandemic compared to control period.

**Results:** ED visits for all conditions initially decreased. During the study period, patients across all diagnoses were more likely to arrive to ED via ambulance. There was increased odds of surgery among patients with an ectopic pregnancy (OR: 1.28, 95% CI: 1.04-1.55) but not appendicitis. Patients with renal failure had an increased odds of hospital admission (OR: 1.14, 95% CI: 1.04-1.24) and 30-day mortality (OR: 1.17, 95% CI: 1.04-1.31).

**Interpretation:** ED volumes for all conditions declined following onset of the pandemic, but returned to baseline. Among patients with renal failure, there was increase in hospitalization and mortality, suggesting delays to care may have contributed to worse outcomes for these patients. For other emergent diagnoses, there were no differences in outcomes.

## INTRODUCTION

On March 11, 2020, the World Health Organization declared COVID-19 a global pandemic.<sup>1</sup> While the direct health consequences of COVID-19 are being heavily researched, the indirect effects of the pandemic have not been well explored. At the beginning of the COVID-19 pandemic, emergency department (ED) volumes across Canada decreased by up to 50%.<sup>2-4</sup> Delays or avoidance of the ED for acute, emergent medical conditions could result in significant downstream detrimental effects, including patient morbidity and mortality. For instance, prior to the pandemic, patients with acute coronary syndrome and stroke with delays to definitive care had worse outcomes compared to those who did not.<sup>5-6</sup>

For patients with an emergent condition, there are relatively few alternative care options other than an ED. During the pandemic, to avoid an ED, patients may have been inclined to contact primary care clinics first, to determine if an ED visit was necessary. During the COVID-19 pandemic, there were reports of reduced in-person physician visits, and an increased uptake of virtual care options such as video or telephone care<sup>7,8</sup>. However, virtual care may not be ideal for emergent conditions, as physicians are unable to physically examine a patient, and may not be able to arrange same day bloodwork/imaging. Therefore, while virtual care may be sufficient for many conditions, we hypothesize that even if such care could be arranged in a timely way, it likely still resulted in significant delays to definitive care for certain time-sensitive, emergent conditions. Therefore, the primary objective of this study was to use population-level data in a universal health care system to examine a marker of higher patient acuity on presentation, hospital admission from the ED, among patients with four emergent, non-COVID related surgical and medical diagnoses during the first year of the pandemic compared to a historical control period. Secondary objectives were to examine other markers of patient acuity, such as

1  
2  
3 arrival by ambulance, and worse associated outcomes (surgery, return hospital admissions after  
4 ED or hospital discharge, and 30-day mortality).  
5  
6  
7  
8  
9

## 10 **METHODS**

### 11 *Study Design and Setting*

12  
13  
14 This was a retrospective cohort study of population-based health data from 2018-2020 in  
15 Ontario, Canada. Patient information was obtained from province-wide administrative health  
16 databases held at ICES.  
17  
18  
19  
20  
21  
22  
23

### 24 *Data Sources*

25  
26 Information regarding ED visits were obtained from the Canadian Institutes of Health  
27 Information National Ambulatory Care Reporting System (CIHI-NACRS). NACRS contains  
28 abstracted data on ED visits in Ontario. CIHI's Discharge Abstract Database (DAD) contains  
29 information on acute care hospitalizations and in-patient surgical procedures in the province.  
30 Ontario Mental Health Reporting System was used to identify hospital episodes of care. The  
31 Ontario Health Insurance Plan (OHIP) database contains physician billings for medically-  
32 necessary care. The Same Day Surgery (SDS) database was used to identify surgery and other  
33 procedures. The Registered Persons Database contains mortality information for Ontario  
34 residents, including out-of-hospital deaths. These databases were also used to obtain  
35 demographics and comorbidities. Patients were linked to the databases using unique, encoded  
36 identifiers, and analyzed at ICES. See *eMethods* in the *Supplement* for further description of  
37 databases.  
38  
39  
40  
41  
42  
43  
44  
45  
46  
47  
48  
49  
50  
51  
52  
53  
54  
55  
56  
57  
58  
59  
60

### *Study Participants*

Using NACRS, we identified patients 18 years and older with a valid OHIP number seen in an ED with one of four pre-selected, time-sensitive (emergent) diagnoses (appendicitis, ectopic pregnancy, renal failure/hyperkalemia, and diabetic ketoacidosis (DKA)) during the first year of the pandemic (March 15–Dec 31, 2020). These conditions were chosen because they are time-sensitive diagnoses (with potentially severe outcomes if missed), that were not expected to change substantially in prevalence during the pandemic. Some patients with these diagnoses may be managed as outpatients (i.e. appendicitis with outpatient antibiotics, non-ruptured ectopic pregnancy via misoprostol) if they meet certain clinical criteria, including earlier presentation for care. The impact of these pandemic on emergency department visits for these conditions have also not been well explored in the literature. A fifth diagnosis, cellulitis, was included as it could be examined as a ‘control’ condition, as it is typically not emergent and can be managed as an outpatient with oral antibiotics if the patient is systemically well. Diagnoses were identified using the ED discharge diagnosis in NACRS, which uses the 10<sup>th</sup> version of the *International Statistical Classification of Diseases and Related Health Problems* (ICD-10) codes. See *eMethods* in the *Supplement* for ICD-10 codes to identify each diagnosis. Only the first ED visit for each diagnosis during the study period was included. We excluded patients who left the ED without being seen or left against medical advice.

### *Outcome Variables*

The primary outcome was hospital admission from the ED: if a greater proportion of patients presenting with the diagnosis in question were admitted to hospital, we considered that a marker of higher acuity and severity on ED presentation. Secondary outcomes of interest

1  
2  
3 included: arrival to ED by ambulance, surgical intervention (for appendicitis and ectopic  
4 pregnancy), return hospital admissions within 30 days of ED or hospital discharge, and 30-day  
5 mortality.  
6  
7  
8  
9

### 10 11 12 *Exposure Variables*

13  
14 The main exposure variable was the time period the ED visit occurred: during the first  
15 year of the pandemic (March 15–Dec 31, 2020) compared to a historical control period, which  
16 was the same time period in 2018 and 2019 (March 15 – Dec 31, 2018 and March 15 - Dec 31,  
17 2019).  
18  
19  
20  
21  
22  
23  
24  
25

### 26 *Covariates*

27  
28 Covariates included in the statistical models were chosen *a priori*, and included  
29 demographics (age, sex, rural residence, income quintile), comorbidities (John Hopkin's  
30 Adjusted Diagnostic Group [ADG] score, asthma, coronary artery disease, congestive heart  
31 failure, chronic obstructive pulmonary disease, cancer, diabetes, hypertension stroke, liver  
32 failure, renal failure), and ED characteristics (day of ED visit, time of ED visit, and hospital type.  
33  
34  
35  
36  
37  
38  
39 See *eMethods* in the *Supplement* for covariate definitions.  
40  
41  
42  
43  
44

### 45 *Data Analysis*

46  
47 First, we examined the frequency of ED visits during the study time periods. We  
48 graphically plotted monthly ED visits for each diagnosis from 2018 to 2020. We then used  
49 standardized differences to compare patient characteristics within each diagnostic group between  
50 those seen during the pandemic period to those seen during the control period. We used a cut-off  
51  
52  
53  
54  
55  
56  
57  
58  
59  
60

1  
2  
3 for standardized differences of  $< 0.10$  to indicate that patients in the two time periods were  
4 similar.<sup>9</sup> We used multivariable logistic regression models to examine the adjusted associations  
5 of the covariables above with the following outcomes: hospital admission, ambulance arrival,  
6 surgery, and 30-day mortality. These models were created for each diagnostic group (i.e. the  
7 diagnostic conditions were examined individually, in relation to outcomes), and odds ratios (OR)  
8 with 95% confidence intervals (CI) were calculated. Cox proportional-hazards models were used  
9 to examine repeat hospital admission within 30-day of ED or hospital discharge by diagnostic  
10 group, with censoring for death or at 30-days. Results were reported as hazard ratios (HR) with  
11 95% CIs.  
12  
13  
14  
15  
16  
17  
18  
19  
20  
21  
22  
23  
24  
25

## 26 **RESULTS**

27  
28 There was an initial reduction in monthly ED visits for all four emergent diagnoses, and  
29 the control diagnosis. The decrease in volumes for all diagnoses appeared to be novel compared  
30 to 2018 and 2019. See Figure 1a-e for monthly ED visits for each diagnosis. For all diagnostic  
31 groups, visits appeared to return to baseline by September 2020.  
32  
33  
34  
35  
36  
37

38 Baseline characteristics of patients with each diagnosis did not vary between the control  
39 and the pandemic period (Tables 1a-e). In adjusted analyses, across all diagnoses, ED patients  
40 seen during the pandemic study period had increased odds of arrival via ambulance compared to  
41 the control period. See table 2 for outcomes among patients with each diagnosis.  
42  
43  
44  
45  
46

47 For patients with an ED visit for appendicitis during the pandemic period, there was no  
48 difference in the adjusted analyses of hospital admission or surgeries performed during the  
49 pandemic study period compared to the control period, while there was a trend toward adjusted  
50  
51  
52  
53  
54  
55  
56  
57  
58  
59  
60



1  
2  
3 increased return hospitalizations within 30 days of ED or hospital discharge (HR 1.13; 95% CI  
4 1.00-1.24). There were too few deaths within 30 days in this group to analyze mortality.  
5  
6

7  
8 For patients diagnosed with an ectopic pregnancy, there was an increased adjusted odds  
9 of surgery compared to the control period (OR: 1.28, 95% CI: 1.04-1.55). There were too few  
10 deaths within 30 days to analyze. There were no differences in hospital admission or return  
11 hospitalization for these patients.  
12  
13  
14  
15

16  
17 Among patients with renal failure/hyperkalemia, there was an increased adjusted odds of  
18 hospital admission on ED presentation (OR: 1.14, 95% CI: 1.04-1.24) and 30-day mortality (OR:  
19 1.17, 95% CI: 1.04-1.31) during the study period compared to the control period. For patients  
20 with DKA and cellulitis, there were no differences in outcomes other than arrival by ambulance.  
21  
22  
23  
24  
25  
26  
27

## 28 **DISCUSSION**

29  
30  
31 In this population-based study, we found an initial reduction in the volume of ED visits at  
32 the start of the pandemic for all four of the emergent diagnoses examined, similar to reports of  
33 *overall* reduced ED volumes globally.<sup>10-15</sup> We found that patients with renal failure had a higher  
34 association of being admitted to hospital when they presented to an ED, but also to die in the  
35 short-term period. These patients had the largest decline in ED volumes early on in the  
36 pandemic, which may have been associated with higher admission rates and mortality when they  
37 presented, possibly due to delays in treatment. These patients are typically older (66% of the  
38 patients in this group were over 65 years old, in stark contrast to other groups) and have far more  
39 frequent healthcare interactions per year,<sup>16,17</sup> which may cause them to be less quick to seek care  
40 when they encounter symptoms. In addition to desensitization, they may also have less easy  
41 access to transport to an ED, with fewer support systems or resources, compared to younger  
42  
43  
44  
45  
46  
47  
48  
49  
50  
51  
52  
53  
54  
55  
56  
57  
58  
59  
60

1  
2  
3 cohorts. While early on, it was identified that patients with chronic kidney disease or who  
4  
5 develop renal failure and have COVID have worse outcomes,<sup>18</sup> the majority of patients in our  
6  
7 study (98%) with renal failure/hyperkalemia were not positive for COVID, therefore, this is  
8  
9 likely not the reason for worse outcomes in this population. Future studies examining this patient  
10  
11 population are needed to explore why these patients had worse outcomes during the pandemic. In  
12  
13 future pandemics, we need to ensure patients with a high baseline morbidity and mortality have  
14  
15 continued ease of access to timely acute medical care.  
16  
17  
18

19 Patients with an ectopic pregnancy were more likely to be treated surgically during the  
20  
21 pandemic. This may indicate more patients presenting outside the window of opportunity for  
22  
23 medical management, or an increased risk of ruptured ectopic, necessitating surgical  
24  
25 management. There have been several reports of increased rates of ruptured ectopic pregnancy  
26  
27 during the pandemic in other regions.<sup>19-21</sup> However, a study using Ontario data did not find a  
28  
29 difference in surgical management of ectopic pregnancy during the first 15 weeks of the  
30  
31 pandemic.<sup>10</sup> This observed difference may be related to the different time periods examined and  
32  
33 differing inclusion criteria. Our finding of an increased risk of requiring surgery may portend  
34  
35 increased known long-term complications from surgical procedures such as infection, bowel  
36  
37 obstruction, adhesions, etc.; however, long-term studies are needed in order to accurately  
38  
39 anticipate potential complications.  
40  
41  
42  
43

44 Patients with appendicitis seen during the pandemic period had a trend toward increased  
45  
46 return hospitalizations after 30-days, but no change in surgical intervention at the time of ED  
47  
48 diagnosis. The increased return hospitalization could potentially reflect higher frequency of  
49  
50 ruptured appendicitis.  
51  
52  
53  
54  
55  
56  
57  
58  
59  
60

1  
2  
3 Similar to our control group of cellulitis, there were no significant differences in hospital  
4 admission, mortality, or repeat hospital admissions during the first year of the pandemic for  
5 patients diagnosed with DKA. This suggests that short-term outcomes were not affected by the  
6 reduced ED volumes in the first few weeks of the pandemic. Alternatively, it is possible that  
7 there were patients with DKA who didn't seek care at all, and died without being included in our  
8 cohort, which would bias the cohort to a less sick population in the pandemic period, potentially  
9 minimizing differences between outcomes vs the pre-pandemic control periods (i.e. conservative  
10 bias). Alternatively, the results may demonstrate that our health care system was able to care for  
11 these patients in the first year of the pandemic without short-term adverse events during a time  
12 where the health care system's focus was on COVID-19 and ensuring hospital capacity to care  
13 for influx of patients COVID.

14  
15 For all comers, there have been many reasons proposed to explain the decrease in ED  
16 usage during the pandemic, including actual reductions in acute pathology, reduced ED usage,  
17 and over-usage of the ED prior to the pandemic.<sup>10,22</sup> Our study focused solely on time-sensitive  
18 emergent conditions and found smaller reductions in ED volumes at the beginning of the  
19 pandemic for most, compared to what has been reported in many other studies (with reports of  
20 up to 65% reductions in ED volume). This likely reflects that patients with these emergent  
21 conditions had reduced ability to access timely definitive treatment elsewhere, and inability to  
22 delay treatment for long. The latter may be reflected in the higher odds of ambulance use for  
23 these patients during the pandemic, which may be a marker of higher acuity and could reflect  
24 disease progression secondary to patient attempts to delay seeking care elsewhere, or simply  
25 trying to delay going to an ED as long as possible, in hopes the symptoms would resolve.

### *Limitations*

There are several limitations with this study. We only included patients who presented to the ED, so we cannot draw conclusions about those who did not seek medical attention or died at home. If a substantial proportion in the pandemic period died at home without ED contact, our study would have missed these patients and introduced a conservative bias to our results, as it would make the study cohort appear healthier than they were. An alternative reason for higher odds of ambulance arrival may be related to patient perceptions that if they presented to an ED via ambulance they may be seen faster, and potentially avoid contracting COVID. Some of the decrease in ED visits for each disease could be related to pandemic behaviors and being more cautious; this might lead to a healthier cohort in the pandemic period, and again, bias results toward the null. Our study used administrative data and there may be potential misclassification bias if there were coding errors used; however, many of these variables have been validated, with good agreement between chart reviews and databases for mandatory variables<sup>23</sup> and the main ED diagnosis for various diseases.<sup>24-26</sup> This study was retrospective, there may be residual differences between groups due to unmeasured confounders between the time periods examined.

### **CONCLUSION**

The volume of ED visits for emergent diagnoses examined initially declined during the first year of the COVID-19 pandemic. The pandemic period was associated with an increased odds of hospitalization and early mortality for patients with renal failure, an increase in surgeries for women with an ectopic pregnancy, and a trend towards re-hospitalization in patients with appendicitis. For other outcomes, and in patients with DKA, there were no significant differences

1  
2  
3 between the pandemic and prior time periods, suggesting the health care system in Ontario was  
4  
5 able to care for many of these patients effectively during the beginning of the pandemic.  
6  
7  
8  
9  
10  
11  
12  
13  
14  
15  
16  
17  
18  
19  
20  
21  
22  
23  
24  
25  
26  
27  
28  
29  
30  
31  
32  
33  
34  
35  
36  
37  
38  
39  
40  
41  
42  
43  
44  
45  
46  
47  
48  
49  
50  
51  
52  
53  
54  
55  
56  
57  
58  
59  
60

Confidential

**References:**

- 1) World Health Organization. WHO Director-General's opening remarks at the media briefing on COVID-19. March 11, 2020. Accessed Jan 17, 2022. Available at: <https://www.who.int/director-general/speeches/detail/who-director-general-s-opening-remarks-at-the-media-briefing-on-covid-19---11-march-2020>
- 2) Lee DD, Jung H, Lou W, et al. The impact of COVID-19 on a large, Canadian community emergency department. *West J Emerg Med.* 2021;22(3):572-9.
- 3) Warnica R. Fear of COVID-19 believed to be behind plummeting number of non-coronavirus ER visits across Canada. *National Post.* Accessed Jan 17 1, 2022. Available at: <https://nationalpost.com/news/fear-of-covid-19-believed-to-be-behind-plummeting-number-of-non-coronavirus-er-visits-across-canada>
- 4) CBC Radio, The Dose. Is it safe to go to the ER during COVID-10? CBC Radio. Accessed Jan 17, 2022. Available at: <https://www.cbc.ca/radio/is-it-safe-to-go-to-the-er-during-covid-19-1.5553011>
- 5) Moser DK, Kimble LP, Alberts MJ. Reducing delay in seeking treatment by patients with acute coronary syndrome and stroke. *Circulation.* 2006;114(2):168-82.
- 6) Lacy CR, Suh DC, Bueno M, et al. Delay in presentation and evaluation for acute stroke: Stroke Time Registry for Outcomes Knowledge and Epidemiology (STROKE). *Stroke.* 2001;32:63-9.
- 7) Canadian Institute for Health Information. Virtual care : A major shift for Canadians receiving physician services. Accessed April 2, 2021. Available at: <https://www.cihi.ca/en/virtual-care-a-major-shift-for-canadians-receiving-physician-services>
- 8) Glazier RH, Green ME, Wu FC, Frymire E, Kopp A, Kiran T. Shifts in office and virtual primary care during the early COVID-19 pandemic in Ontario, Canada. *CMAJ.* 2021;193(6):E200-210.
- 9) Austin PC. Balance diagnostics for comparing the distribution of baseline covariates between treatment groups in propensity-score matched samples. *Stat Med.* 2009; 28(25):3083-3107.
- 10) Gomez D, Simpson AN, Sue-Chue-Lam C, et al. A population-based analysis of the impact of the COVID-19 pandemic on common abdominal and gynecological emergency department visits. *CMAJ.* 2021;193(21):E753-60.
- 11) Lee DD, Jung H, Lou W, et al. The impact of COVID-19 on a large, Canadian community emergency department. *West J Emerg Med.* 2021;22(3):572-9.
- 12) Canadian Institute for Health Information. COVID-19's impact on emergency departments. Accessed Jan 17, 2022. Available at: <https://www.cihi.ca/en/covid-19-resources/impact-of-covid-19-on-canadas-health-care-systems/emergency-departments>
- 13) Bergonti M. Emergency room visits in the COVID-19 pandemic. *Eur Heart J.* 2021;42(5):369-70.
- 14) Heppner Z, Shreffler J, Polites A, Ross A, Thomas JJ, Huecker M. COVID-19 and emergency department volume: The patients return but have different characteristics. *Am J Emerg Med.* 2021; 385-8.

- 15) Jeffery MM, D'Onofrio G, Paek H, et al. Trends in Emergency Department Visits and Hospital Admissions in Health Care Systems in 5 States in the First Months of the COVID-19 Pandemic in the US. *JAMA Intern Med.* 2020; 180(10):1328-33.
- 16) Bauseister SE, Boger CA, Kramer BK, et al. Effect of chronic kidney disease and comorbid conditions on health care costs: A 10-year observational study in a general population. *Am J Nephrol.* 2010;31:229-9.
- 17) Smith DH, Guillion CM, Nichols G, Keith DS, Brown JB. Cost of medical care for chronic kidney disease and comorbidity among enrollees in a large HMO population. *J Am Soc Nephrol.* 2004;15:1300-6.
- 18) Gasparini M, Khan S, Patel JM, et al. Renal impairment and its impact on clinical outcomes in patients who are critically ill with COVID-19: A multicenter observational study. *Anesthesia.* 2021; 76(3):320-6.
- 19) Anteby M, Van Mil L, Michaan N, Laskov I, Grisaru D. Effects of the COVID-19 pandemic on timely care for extrauterine pregnancies. A retrospective analysis. *Lancet Reg Health Eur.* 2021; 2:100026.
- 20) Dvasha S, Cucklec H, Smorgicka N, Vaknina Z, Padoaa A, Maymona R. Increased rate of ruptured tubal ectopic pregnancy during the COVID-19 pandemic. *Eur J Obstet Gynecol Reprod Biol.* 2021;259:95-9.
- 21) Casadio P, Youssef A, Arena A, Gamal N, Pilu G, Seracchioli R. Increased rate of ruptured ectopic pregnancy in COVID-19 pandemic: Analysis from the north of Italy. *Ultrasound Obstet Gynecol.* 2020;56(2):289.
- 22) Pikoulis E, Solomos Z, Riza E. Gathering evidence on the decreased emergency room visits during the coronavirus disease 19 pandemic. *Public Health.* 2020;185:42-3.
- 23) Canadian Institute for Health Information. CIHI data quality study of Ontario emergency department visits for fiscal year 2004–2005: Executive summary. Ottawa, ON: CIHI; 2008.
- 24) Atzema CL, Austin PC, Miller E, Chong AS, Yun L, Dorian P. A population-based description of atrial fibrillation in the emergency department: 2002-2010. *Ann Emerg Med.* 2013;62(6):570-7.
- 25) Masood S, Austin PC, Atzema CL. A population-based analysis of outcomes in patients with a primary diagnosis of hypertension in the emergency department. *Ann Emerg Med.* 2016;68(3):258-67.
- 26) Grewal K, Austin PC, Kapral MK, Lu H, Atzema CL. Missed strokes using computed tomography imaging in patients with vertigo: Population-based cohort study. *Stroke.* 2015;46(1):108-13.

1  
2  
3  
4  
5  
6  
7  
8  
9  
10  
11  
12  
13  
14  
15  
16  
17  
18  
19  
20  
21  
22  
23  
24  
25  
26  
27  
28  
29  
30  
31  
32  
33  
34  
35  
36  
37  
38  
39  
40  
41  
42  
43  
44  
45  
46  
47  
48  
49  
50  
51  
52  
53  
54  
55  
56  
57  
58  
59  
60

Figure 1 a- e: Monthly ED visits for each emergency diagnosis

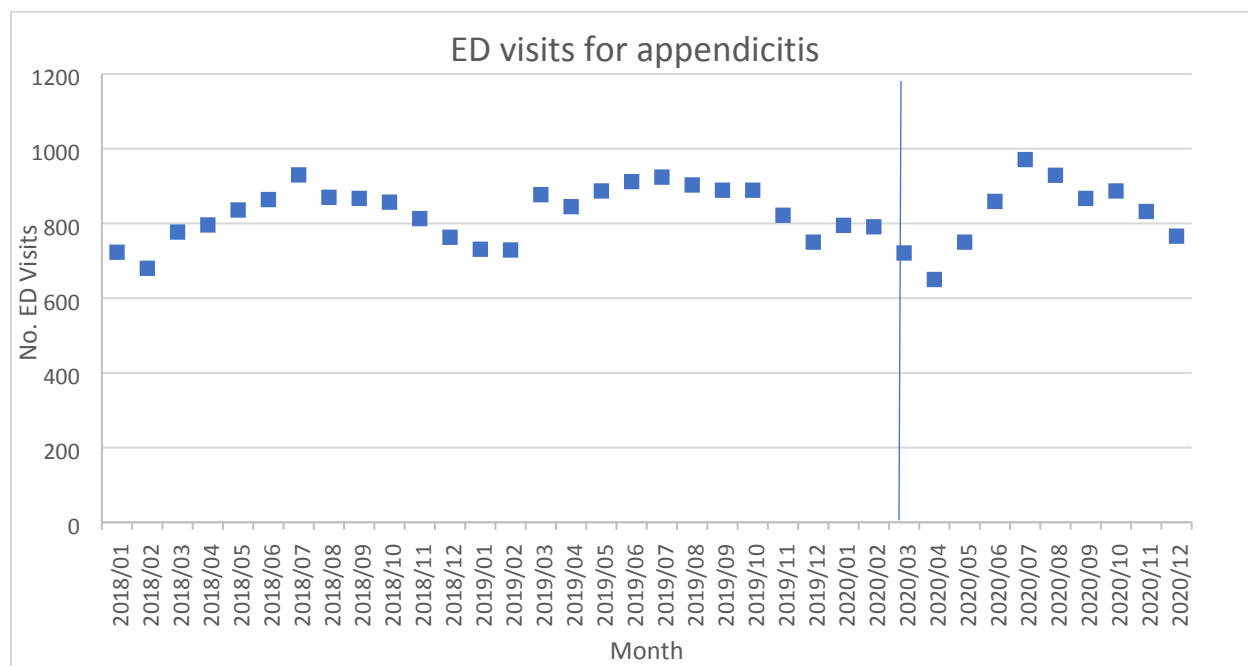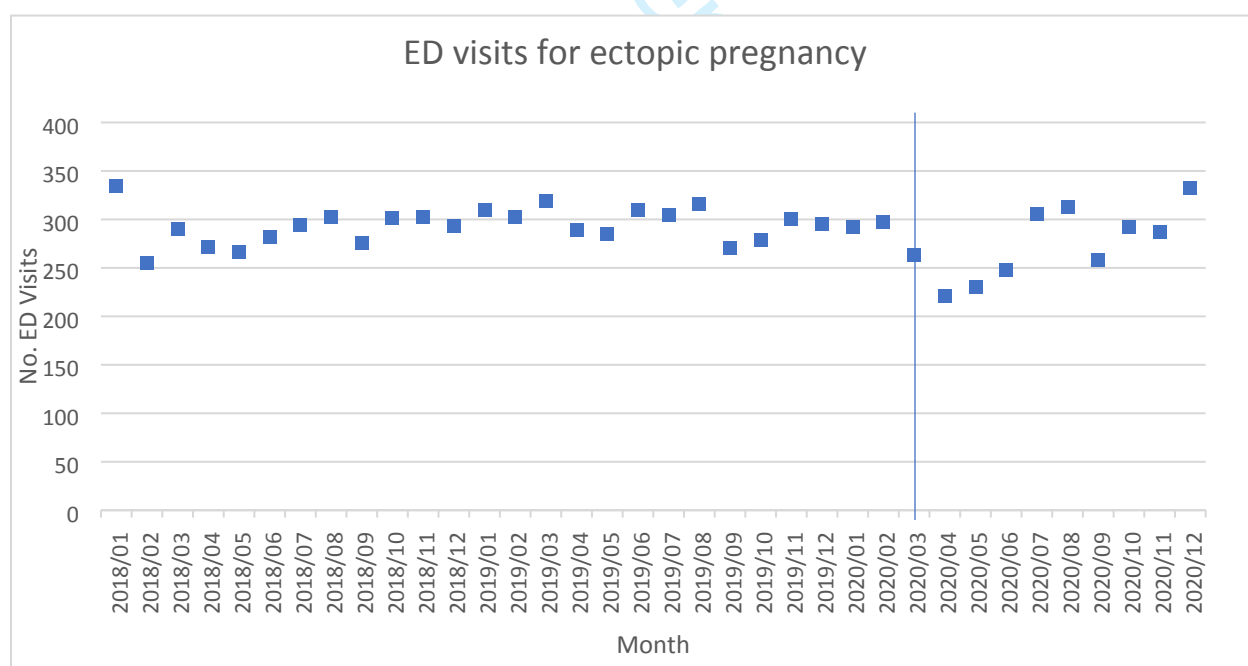



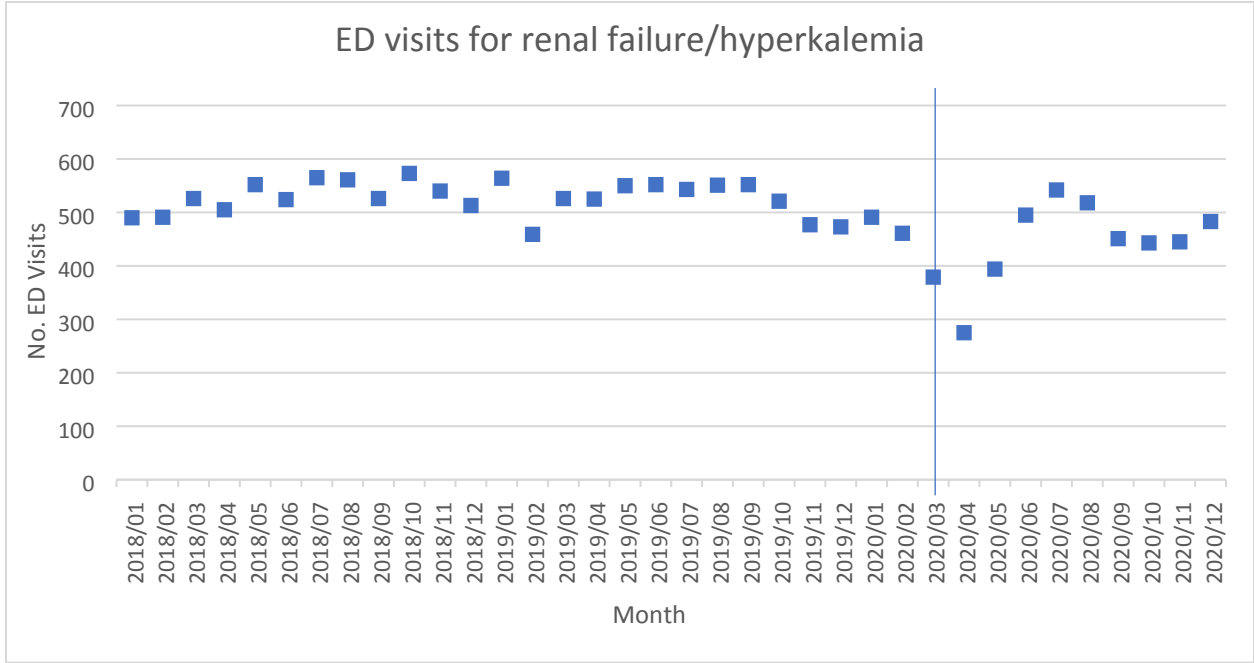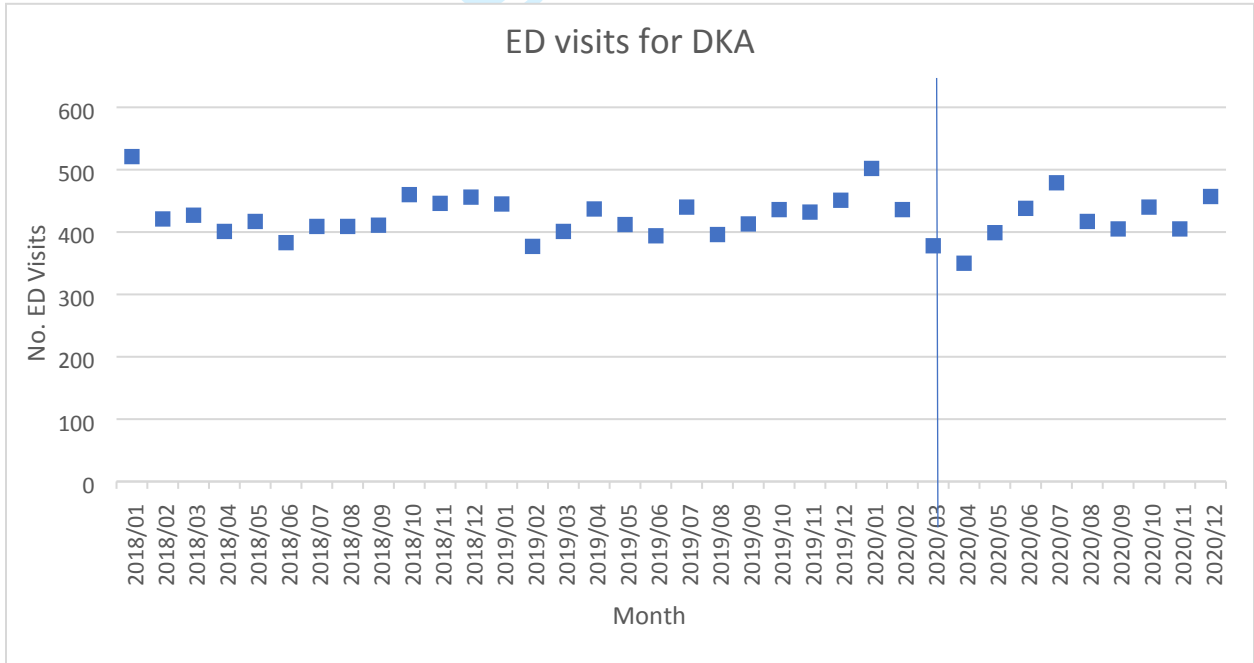

1  
2  
3  
4  
5  
6  
7  
8  
9  
10  
11  
12  
13  
14  
15  
16  
17  
18  
19  
20  
21  
22  
23  
24  
25  
26  
27  
28  
29  
30  
31  
32  
33  
34  
35  
36  
37  
38  
39  
40  
41  
42  
43  
44  
45  
46  
47  
48  
49  
50  
51  
52  
53  
54  
55  
56  
57  
58  
59  
60

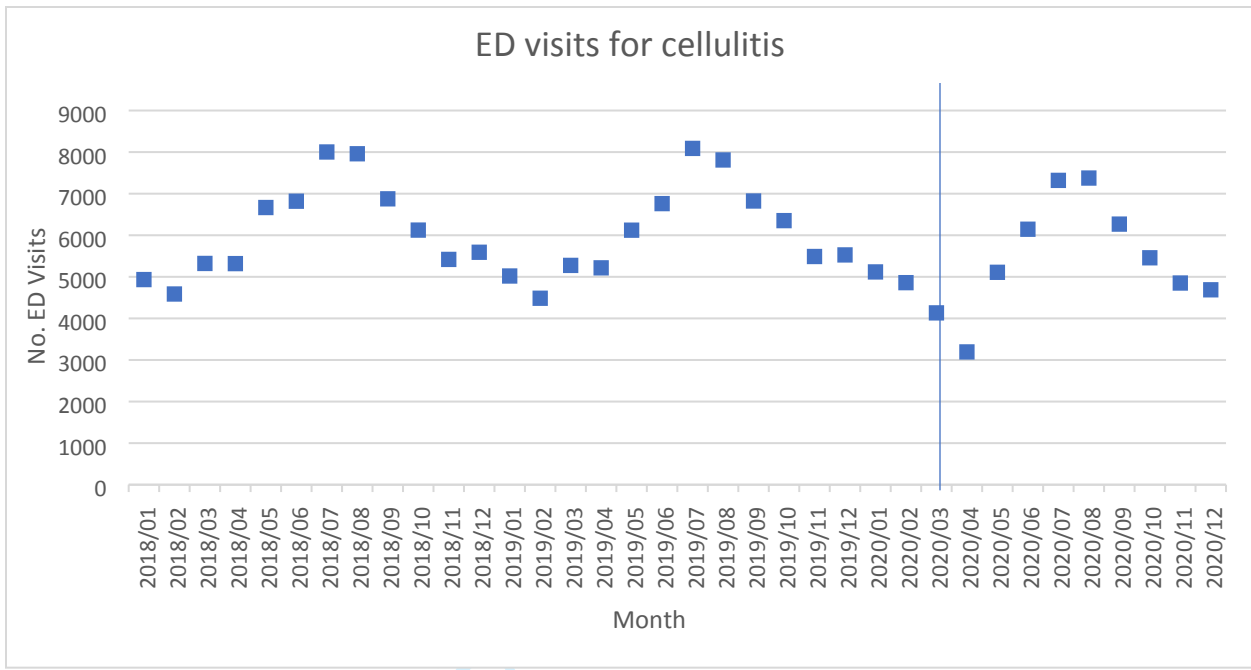

Confidential

Table 1a: Baseline characteristics for patients with appendicitis

| Variable, n (%)                       |                       | Total           | 2020            | 2018 & 2019     | Standardized Difference |
|---------------------------------------|-----------------------|-----------------|-----------------|-----------------|-------------------------|
|                                       |                       | <b>N=23,962</b> | <b>N=7,771</b>  | <b>N=16,191</b> |                         |
| <b>Demographics</b>                   |                       |                 |                 |                 |                         |
| Age                                   | 18-64                 | 20,835 (87.0%)  | 6,711 (86.4%)   | 14,124 (87.2%)  | 0.03                    |
|                                       | 65+                   | 3,127 (13.0%)   | 1,060 (13.6%)   | 2,067 (12.8%)   | 0.03                    |
| Sex                                   | Female                | 12,238 (51.1%)  | 3,944 (50.8%)   | 8,294 (51.2%)   | 0.01                    |
| Rural                                 | Urban                 | 22,460 (94.6%)  | 7,266 (94.4%)   | 15,194 (94.6%)  | 0.01                    |
|                                       | Rural                 | 1,293 (5.4%)    | 430 (5.6%)      | 863 (5.4%)      | 0.01                    |
| Income Quintile                       | 1 (high)              | 4,645 (19.4%)   | 1,489 (19.2%)   | 3,156 (19.6%)   | 0.01                    |
|                                       | 2                     | 4,777 (20.0%)   | 1,513 (19.5%)   | 3,264 (20.2%)   | 0.02                    |
|                                       | 3                     | 4,647 (19.5%)   | 1,525 (19.7%)   | 3,122 (19.3%)   | 0.01                    |
|                                       | 4                     | 4,879 (20.4%)   | 1,562 (20.2%)   | 3,317 (20.6%)   | 0.01                    |
|                                       | 5 (low)               | 4,942 (20.7%)   | 1,661 (21.4%)   | 3,281 (20.3%)   | 0.03                    |
| <b>Comorbidities</b>                  |                       |                 |                 |                 |                         |
| ADG Score                             | Mean $\pm$ SD         | 8.75 $\pm$ 4.36 | 8.64 $\pm$ 4.43 | 8.81 $\pm$ 4.33 | 0.04                    |
|                                       | Median (IQR)          | 9 (6-12)        | 8 (5-12)        | 9 (6-12)        | 0.04                    |
| Coronary artery disease               |                       | 957 (4.0%)      | 316 (4.1%)      | 641 (4.0%)      | 0.01                    |
| Chronic obstructive pulmonary disease |                       | 1,472 (6.1%)    | 476 (6.1%)      | 996 (6.2%)      | 0                       |
| Congestive heart failure              |                       | 407 (1.7%)      | 135 (1.7%)      | 272 (1.7%)      | 0                       |
| Diabetes mellitus                     |                       | 2,135 (8.9%)    | 693 (8.9%)      | 1,442 (8.9%)    | 0                       |
| Hypertension                          |                       | 4,785 (20.0%)   | 1,517 (19.5%)   | 3,268 (20.2%)   | 0.02                    |
| Asthma                                |                       | 4,205 (17.5%)   | 1,334 (17.2%)   | 2,871 (17.7%)   | 0.01                    |
| Cancer                                |                       | 521 (2.2%)      | 171 (2.2%)      | 350 (2.2%)      | 0                       |
| Stroke                                |                       | 231 (1.0%)      | 67 (0.9%)       | 164 (1.0%)      | 0.02                    |
| Liver failure                         |                       | 74 (0.3%)       | 28 (0.4%)       | 46 (0.3%)       | 0.01                    |
| Renal Failure                         |                       | 318 (1.3%)      | 104 (1.3%)      | 214 (1.3%)      | 0                       |
| <b>ED Characteristics</b>             |                       |                 |                 |                 |                         |
| Weekday ED visit (Monday to Friday)   |                       | 17,999 (75.1%)  | 5,818 (74.9%)   | 12,181 (75.2%)  | 0.01                    |
| Time of ED visit                      | Day [08:00-16:59]     | 13,284 (55.4%)  | 4,314 (55.5%)   | 8,970 (55.4%)   | 0                       |
|                                       | Evening [17:00-23:59] | 6,223 (26.0%)   | 2,057 (26.5%)   | 4,166 (25.7%)   | 0.02                    |
|                                       | Night [00:00-07:59]   | 4,455 (18.6%)   | 1,400 (18.0%)   | 3,055 (18.9%)   | 0.02                    |
| Hospital Type                         | Community             | 18,084 (75.5%)  | 5,881 (75.7%)   | 12,203 (75.4%)  | 0.01                    |
|                                       | Small                 | 661 (2.8%)      | 213 (2.7%)      | 448 (2.8%)      | 0                       |
|                                       | Teaching              | 5,217 (21.8%)   | 1,677 (21.6%)   | 3,540 (21.9%)   | 0.01                    |

ADG: adjusted diagnostic groups; ED: emergency department; SD: standardized difference; IQR: interquartile range

Table 1b: Baseline characteristics for patients with ectopic pregnancy

| Variable, n (%)                       |                       | Total           | 2020            | 2018 & 2019     | Standardized Difference |
|---------------------------------------|-----------------------|-----------------|-----------------|-----------------|-------------------------|
|                                       |                       | <b>N=7,776</b>  | <b>N=2,490</b>  | <b>N=5,286</b>  |                         |
| <b>Demographics</b>                   |                       |                 |                 |                 |                         |
| Age                                   | 18-64                 | 7,776 (100.0%)  | 2,490 (100.0%)  | 5,286 (100.0%)  | .                       |
| Sex                                   | Female                | 7,776 (100.0%)  | 2,490 (100.0%)  | 5,286 (100.0%)  | .                       |
| Rural                                 | Urban                 | 7,258 (94.2%)   | 2,321 (94.2%)   | 4,937 (94.1%)   | 0                       |
|                                       | Rural                 | 450 (5.8%)      | 142 (5.8%)      | 308 (5.9%)      | 0                       |
| Income Quintile                       | 1 (high)              | 1,977 (25.5%)   | 632 (25.4%)     | 1,345 (25.5%)   | 0                       |
|                                       | 2                     | 1,710 (22.0%)   | 558 (22.4%)     | 1,152 (21.8%)   | 0.02                    |
|                                       | 3                     | 1,562 (20.1%)   | 532 (21.4%)     | 1,030 (19.5%)   | 0.05                    |
|                                       | 4                     | 1,428 (18.4%)   | 438 (17.6%)     | 990 (18.7%)     | 0.03                    |
|                                       | 5 (low)               | 1,091 (14.0%)   | 326 (13.1%)     | 765 (14.5%)     | 0.04                    |
| <b>Comorbidities</b>                  |                       |                 |                 |                 |                         |
| ADG Score                             | Mean $\pm$ SD         | 9.10 $\pm$ 4.03 | 8.77 $\pm$ 4.05 | 9.25 $\pm$ 4.01 | 0.12                    |
|                                       | Median (IQR)          | 9 (6-12)        | 9 (6-12)        | 9 (7-12)        | 0.12                    |
| Coronary artery disease               |                       | 21 (0.3%)       | 7 (0.3%)        | 14 (0.3%)       | 0                       |
| Chronic obstructive pulmonary disease |                       | 17 (0.2%)       | 7 (0.3%)        | 10 (0.2%)       | 0.02                    |
| Congestive heart failure              | 0                     | 7,776 (100.0%)  | 2,490 (100.0%)  | 5,286 (100.0%)  | .                       |
| Diabetes mellitus                     |                       | 208 (2.7%)      | 59 (2.4%)       | 149 (2.8%)      | 0.03                    |
| Hypertension                          |                       | 228 (2.9%)      | 58 (2.3%)       | 170 (3.2%)      | 0.05                    |
| Asthma                                |                       | 1,485 (19.1%)   | 450 (18.1%)     | 1,035 (19.6%)   | 0.04                    |
| Cancer                                |                       | 21 (0.3%)       | 7 (0.3%)        | 14 (0.3%)       | 0                       |
| Stroke                                |                       | 7 (0.1%)        | $\leq$ 5        | $\leq$ 10       | 0.03                    |
| Liver failure                         |                       | 6 (0.1%)        | $\leq$ 5        | $\leq$ 5        | 0                       |
| Renal Failure                         |                       | 15 (0.2%)       | $\leq$ 5        | $\leq$ 15       | 0.04                    |
| <b>ED Characteristics</b>             |                       |                 |                 |                 |                         |
| Weekday ED visit (Monday to Friday)   | 1                     | 6,007 (77.3%)   | 1,921 (77.1%)   | 4,086 (77.3%)   | 0                       |
| Time of ED visit                      | Day [08:00-16:59]     | 4,868 (62.6%)   | 1,604 (64.4%)   | 3,264 (61.7%)   | 0.06                    |
|                                       | Evening [17:00-23:59] | 2,217 (28.5%)   | 687 (27.6%)     | 1,530 (28.9%)   | 0.03                    |
|                                       | Night [00:00-07:59]   | 691 (8.9%)      | 199 (8.0%)      | 492 (9.3%)      | 0.05                    |
| Hospital Type                         | Community             | 5,934 (76.3%)   | 1,919 (77.1%)   | 4,015 (76.0%)   | 0.03                    |
|                                       | Small                 | 237 (3.0%)      | 89 (3.6%)       | 148 (2.8%)      | 0.04                    |
|                                       | Teaching              | 1,605 (20.6%)   | 482 (19.4%)     | 1,123 (21.2%)   | 0.05                    |

\*some cells have been suppressed to prevent back calculation of low cell volumes

ADG: adjusted diagnostic groups; ED: emergency department; SD: standardized difference; IQR: interquartile range

Table 1c: Baseline characteristics for patients with renal failure/hyperkalemia

| Variable, n (%)                       |                       | Total           | 2020           | 2018 & 2019    | Standardized Difference |
|---------------------------------------|-----------------------|-----------------|----------------|----------------|-------------------------|
|                                       |                       | <b>N=13,502</b> | <b>N=3,942</b> | <b>N=9,560</b> |                         |
| <b>Demographics</b>                   |                       |                 |                |                |                         |
| Age                                   | 18-64                 | 4,565 (33.8%)   | 1,330 (33.7%)  | 3,235 (33.8%)  | 0                       |
|                                       | 65+                   | 8,937 (66.2%)   | 2,612 (66.3%)  | 6,325 (66.2%)  | 0                       |
| Sex                                   | Female                | 6,128 (45.4%)   | 1,757 (44.6%)  | 4,371 (45.7%)  | 0.02                    |
| Rural                                 | Urban                 | 11,571 (88.4%)  | 3,343 (87.5%)  | 8,228 (88.7%)  | 0.04                    |
|                                       | Rural                 | 1,520 (11.6%)   | 476 (12.5%)    | 1,044 (11.3%)  | 0.04                    |
| Income Quintile                       | 1 (high)              | 3,923 (29.2%)   | 1,092 (27.8%)  | 2,831 (29.7%)  | 0.04                    |
|                                       | 2                     | 2,955 (22.0%)   | 925 (23.5%)    | 2,030 (21.3%)  | 0.05                    |
|                                       | 3                     | 2,547 (18.9%)   | 745 (19.0%)    | 1,802 (18.9%)  | 0                       |
|                                       | 4                     | 2,162 (16.1%)   | 614 (15.6%)    | 1,548 (16.3%)  | 0.02                    |
|                                       | 5 (low)               | 1,861 (13.8%)   | 552 (14.1%)    | 1,309 (13.8%)  | 0.01                    |
| <b>Comorbidities</b>                  |                       |                 |                |                |                         |
| ADG Score                             | Mean ± SD             | 14.22 ± 4.43    | 14.33 ± 4.47   | 14.17 ± 4.41   | 0.04                    |
|                                       | Median (IQR)          | 15 (11-17)      | 15 (12-18)     | 15 (11-17)     | 0.04                    |
| Coronary artery disease               |                       | 4,067 (30.1%)   | 1,152 (29.2%)  | 2,915 (30.5%)  | 0.03                    |
| Chronic obstructive pulmonary disease |                       | 4,136 (30.6%)   | 1,187 (30.1%)  | 2,949 (30.8%)  | 0.02                    |
| Congestive heart failure              |                       | 4,671 (34.6%)   | 1,372 (34.8%)  | 3,299 (34.5%)  | 0.01                    |
| Diabetes mellitus                     |                       | 8,883 (65.8%)   | 2,605 (66.1%)  | 6,278 (65.7%)  | 0.01                    |
| Hypertension                          |                       | 11,526 (85.4%)  | 3,340 (84.7%)  | 8,186 (85.6%)  | 0.03                    |
| Asthma                                |                       | 2,534 (18.8%)   | 718 (18.2%)    | 1,816 (19.0%)  | 0.02                    |
| Cancer                                |                       | 1,413 (10.5%)   | 409 (10.4%)    | 1,004 (10.5%)  | 0                       |
| Stroke                                |                       | 1,303 (9.7%)    | 376 (9.5%)     | 927 (9.7%)     | 0.01                    |
| Liver failure                         |                       | 549 (4.1%)      | 169 (4.3%)     | 380 (4.0%)     | 0.02                    |
| Renal Failure                         |                       | 7,250 (53.7%)   | 2,133 (54.1%)  | 5,117 (53.5%)  | 0.01                    |
| <b>ED Characteristics</b>             |                       |                 |                |                |                         |
| Weekday ED visit (Monday to Friday)   |                       | 10,642 (78.8%)  | 3,142 (79.7%)  | 7,500 (78.5%)  | 0.03                    |
| Time of ED visit                      | Day [08:00-16:59]     | 8,382 (62.1%)   | 2,445 (62.0%)  | 5,937 (62.1%)  | 0                       |
|                                       | Evening [17:00-23:59] | 3,818 (28.3%)   | 1,104 (28.0%)  | 2,714 (28.4%)  | 0.01                    |
|                                       | Night [00:00-07:59]   | 1,302 (9.6%)    | 393 (10.0%)    | 909 (9.5%)     | 0.02                    |
| Hospital Type                         | Community             | 9,608 (71.2%)   | 2,833 (71.9%)  | 6,775 (70.9%)  | 0.02                    |
|                                       | Small                 | 1,022 (7.6%)    | 319 (8.1%)     | 703 (7.4%)     | 0.03                    |
|                                       | Teaching              | 2,872 (21.3%)   | 790 (20.0%)    | 2,082 (21.8%)  | 0.04                    |

ADG: adjusted diagnostic groups; ED: emergency department; SD: standardized difference; IQR: interquartile range

Table 1d: Baseline characteristics for patients with diabetic ketoacidosis

| Variable, n (%)                       |                       | Total            | 2020             | 2018 & 2019      | Standardized Difference |
|---------------------------------------|-----------------------|------------------|------------------|------------------|-------------------------|
|                                       |                       | <b>N=9,957</b>   | <b>N=3,376</b>   | <b>N=6,581</b>   |                         |
| <b>Demographics</b>                   |                       |                  |                  |                  |                         |
| Age                                   | 18-64                 | 7,668 (77.0%)    | 2,571 (76.2%)    | 5,097 (77.5%)    | 0.03                    |
|                                       | 65+                   | 2,289 (23.0%)    | 805 (23.8%)      | 1,484 (22.5%)    | 0.03                    |
| Sex                                   | Female                | 4,679 (47.0%)    | 1,505 (44.6%)    | 3,174 (48.2%)    | 0.07                    |
| Rural                                 | Urban                 | 8,844 (91.2%)    | 3,010 (91.7%)    | 5,834 (90.9%)    | 0.03                    |
|                                       | Rural                 | 854 (8.8%)       | 271 (8.3%)       | 583 (9.1%)       | 0.03                    |
| Income Quintile                       | 1 (high)              | 3,109 (31.4%)    | 1,061 (31.5%)    | 2,048 (31.3%)    | 0.01                    |
|                                       | 2                     | 2,216 (22.4%)    | 777 (23.1%)      | 1,439 (22.0%)    | 0.03                    |
|                                       | 3                     | 1,780 (18.0%)    | 588 (17.5%)      | 1,192 (18.2%)    | 0.02                    |
|                                       | 4                     | 1,567 (15.8%)    | 528 (15.7%)      | 1,039 (15.9%)    | 0                       |
|                                       | 5 (low)               | 1,240 (12.5%)    | 409 (12.2%)      | 831 (12.7%)      | 0.02                    |
| <b>Comorbidities</b>                  |                       |                  |                  |                  |                         |
| ADG Score                             | Mean $\pm$ SD         | 11.93 $\pm$ 5.01 | 11.62 $\pm$ 5.07 | 12.08 $\pm$ 4.98 | 0.09                    |
|                                       | Median (IQR)          | 12 (8-16)        | 12 (8-15)        | 12 (9-16)        | 0.09                    |
| Coronary artery disease               |                       | 1,201 (12.1%)    | 404 (12.0%)      | 797 (12.1%)      | 0                       |
| Chronic obstructive pulmonary disease |                       | 1,325 (13.3%)    | 441 (13.1%)      | 884 (13.4%)      | 0.01                    |
| Congestive heart failure              |                       | 838 (8.4%)       | 277 (8.2%)       | 561 (8.5%)       | 0.01                    |
| Diabetes mellitus                     |                       | 8,750 (87.9%)    | 2,850 (84.4%)    | 5,900 (89.7%)    | 0.16                    |
| Hypertension                          |                       | 4,504 (45.2%)    | 1,525 (45.2%)    | 2,979 (45.3%)    | 0                       |
| Asthma                                |                       | 2,137 (21.5%)    | 714 (21.1%)      | 1,423 (21.6%)    | 0.01                    |
| Cancer                                |                       | 414 (4.2%)       | 149 (4.4%)       | 265 (4.0%)       | 0.02                    |
| Stroke                                |                       | 460 (4.6%)       | 163 (4.8%)       | 297 (4.5%)       | 0.01                    |
| Liver failure                         |                       | 141 (1.4%)       | 43 (1.3%)        | 98 (1.5%)        | 0.02                    |
| Renal Failure                         |                       | 1,210 (12.2%)    | 404 (12.0%)      | 806 (12.2%)      | 0.01                    |
| <b>ED Characteristics</b>             |                       |                  |                  |                  |                         |
| Weekday ED visit (Monday to Friday)   |                       | 7,225 (72.6%)    | 2,449 (72.5%)    | 4,776 (72.6%)    | 0                       |
| Time of ED visit                      | Day [08:00-16:59]     | 5,207 (52.3%)    | 1,777 (52.6%)    | 3,430 (52.1%)    | 0.01                    |
|                                       | Evening [17:00-23:59] | 3,129 (31.4%)    | 1,065 (31.5%)    | 2,064 (31.4%)    | 0                       |
|                                       | Night [00:00-07:59]   | 1,621 (16.3%)    | 534 (15.8%)      | 1,087 (16.5%)    | 0.02                    |
| Hospital Type                         | Community             | 6,933 (69.6%)    | 2,370 (70.2%)    | 4,563 (69.3%)    | 0.02                    |
|                                       | Small                 | 630 (6.3%)       | 209 (6.2%)       | 421 (6.4%)       | 0.01                    |
|                                       | Teaching              | 2,394 (24.0%)    | 797 (23.6%)      | 1,597 (24.3%)    | 0.02                    |

ADG: adjusted diagnostic groups; ED: emergency department; SD: standardized difference; IQR: interquartile range

Table 1e: Baseline characteristics for patients with cellulitis

| Variable, n (%)                       |                       | Total            | 2020            | 2018 & 2019      | Standardized Difference |
|---------------------------------------|-----------------------|------------------|-----------------|------------------|-------------------------|
|                                       |                       | <b>N=160,788</b> | <b>N=47,886</b> | <b>N=112,902</b> |                         |
| <b>Demographics</b>                   |                       |                  |                 |                  |                         |
| Age                                   | 18-64                 | 106,726 (66.4%)  | 31,960 (66.7%)  | 74,765 (66.2%)   | 0.01                    |
|                                       | 65+                   | 54,062 (33.6%)   | 15,925 (33.3%)  | 38,137 (33.8%)   | 0.01                    |
| Sex                                   | Female                | 72,098 (44.8%)   | 20,888 (43.6%)  | 51,210 (45.4%)   | 0.03                    |
| Rural                                 | Urban                 | 133,276 (85.2%)  | 39,637 (85.0%)  | 93,639 (85.3%)   | 0.01                    |
|                                       | Rural                 | 23,124 (14.8%)   | 6,991 (15.0%)   | 16,133 (14.7%)   | 0.01                    |
| Income Quintile                       | 1 (high)              | 41,606 (26.0%)   | 12,563 (26.4%)  | 29,043 (25.8%)   | 0.01                    |
|                                       | 2                     | 33,627 (21.0%)   | 10,101 (21.2%)  | 23,526 (20.9%)   | 0.01                    |
|                                       | 3                     | 30,571 (19.1%)   | 8,949 (18.8%)   | 21,622 (19.2%)   | 0.01                    |
|                                       | 4                     | 28,181 (17.6%)   | 8,358 (17.5%)   | 19,823 (17.6%)   | 0                       |
|                                       | 5 (low)               | 26,060 (16.3%)   | 7,689 (16.1%)   | 18,371 (16.3%)   | 0.01                    |
| <b>Comorbidities</b>                  |                       |                  |                 |                  |                         |
| ADG Score                             | Mean ± SD             | 11.46 ± 4.83     | 11.47 ± 4.83    | 11.45 ± 4.83     | 0                       |
|                                       | Median (IQR)          | 12 (8-15)        | 12 (8-15)       | 12 (8-15)        | 0.01                    |
| Coronary artery disease               |                       | 17,649 (11.0%)   | 5,140 (10.7%)   | 12,509 (11.1%)   | 0.01                    |
| Chronic obstructive pulmonary disease |                       | 29,535 (18.4%)   | 8,871 (18.5%)   | 20,664 (18.3%)   | 0.01                    |
| Congestive heart failure              |                       | 15,741 (9.8%)    | 4,641 (9.7%)    | 11,100 (9.8%)    | 0                       |
| Diabetes mellitus                     |                       | 40,828 (25.4%)   | 12,095 (25.3%)  | 28,733 (25.4%)   | 0                       |
| Hypertension                          |                       | 68,935 (42.9%)   | 20,155 (42.1%)  | 48,780 (43.2%)   | 0.02                    |
| Asthma                                |                       | 33,642 (20.9%)   | 10,332 (21.6%)  | 23,310 (20.6%)   | 0.02                    |
| Cancer                                |                       | 7,304 (4.5%)     | 2,098 (4.4%)    | 5,206 (4.6%)     | 0.01                    |
| Stroke                                |                       | 5,131 (3.2%)     | 1,456 (3.0%)    | 3,675 (3.3%)     | 0.01                    |
| Liver failure                         |                       | 2,020 (1.3%)     | 646 (1.3%)      | 1,374 (1.2%)     | 0.01                    |
| Renal Failure                         |                       | 9,188 (5.7%)     | 2,692 (5.6%)    | 6,496 (5.8%)     | 0.01                    |
| <b>ED Characteristics</b>             |                       |                  |                 |                  |                         |
| Weekday ED visit (Monday to Friday)   |                       | 114,962 (71.5%)  | 34,581 (72.2%)  | 80,381 (71.2%)   | 0.02                    |
| Time of ED visit                      | Day [08:00-16:59]     | 95,050 (59.1%)   | 29,088 (60.7%)  | 65,962 (58.4%)   | 0.05                    |
|                                       | Evening [17:00-23:59] | 49,625 (30.9%)   | 14,131 (29.5%)  | 35,494 (31.4%)   | 0.04                    |
|                                       | Night [00:00-07:59]   | 16,113 (10.0%)   | 4,667 (9.7%)    | 11,446 (10.1%)   | 0.01                    |
| Hospital Type*                        | Community             | -                | -               | -                | 0                       |
|                                       | Paeds                 | -                | -               | -                |                         |
|                                       | Small                 | -                | -               | -                | 0.01                    |
|                                       | Teaching              | -                | -               | -                | 0                       |

ADG: adjusted diagnostic groups; ED: emergency department; SD: standardized difference; IQR: interquartile range

\*cells suppressed to prevent back calculation

1  
2  
3  
4  
5  
6  
7  
8  
9  
10  
11  
12  
13  
14  
15  
16  
17  
18  
19  
20  
21  
22  
23  
24  
25  
26  
27  
28  
29  
30  
31  
32  
33  
34  
35  
36  
37  
38  
39  
40  
41  
42  
43  
44  
45  
46  
47

**Table 2: Outcomes during the pandemic period compared to control period for patients**

| <b>Outcome</b>                       | <b>Appendicitis<br/>Adjusted* OR or<br/>HR (95% CI)</b> | <b>Ectopic Pregnancy<br/>Adjusted<sup>∞</sup> OR or<br/>HR (95% CI)</b> | <b>Renal Failure<br/>Adjusted* OR or<br/>HR (95% CI)</b> | <b>DKA<br/>Adjusted* OR or<br/>HR (95% CI)</b> | <b>Cellulitis<br/>Adjusted* OR or<br/>HR (95% CI)</b> |
|--------------------------------------|---------------------------------------------------------|-------------------------------------------------------------------------|----------------------------------------------------------|------------------------------------------------|-------------------------------------------------------|
| Ambulance arrival                    | 1.47 (1.35-1.61)                                        | 1.41 (1.16-1.71)                                                        | 1.22 (1.11-1.33)                                         | 1.27 (1.17-1.38)                               | 1.19 (1.15-1.25)                                      |
| Hospital admission                   | 0.98 (0.89-1.07)                                        | 1.06 (0.96-1.17)                                                        | 1.14 (1.04-1.24)                                         | 1.11 (0.97-1.27)                               | 1.01 (0.95-1.07)                                      |
| Surgery                              | 0.97 (0.90-1.05)                                        | 1.27 (1.04-1.55)                                                        | -                                                        | -                                              | -                                                     |
| Hospital admission<br>within 30 days | 1.13 (1.00-1.24)                                        | 0.92 (0.79-1.08)                                                        | 0.92 (0.84-1.00)                                         | 1.05 (0.93-1.18)                               | 0.97 (0.93-1.01)                                      |
| 30-day mortality                     | Too few outcomes                                        | Too few outcomes                                                        | 1.17 (1.04-1.31)                                         | 1.15 (0.91-1.46)                               | 1.03 (0.91-1.16)                                      |

\*adjusted for covariables listed in Table 1a,c,d,e;

<sup>∞</sup> adjusted for covariables listed in Table 1b, except coronary artery disease, chronic obstructive pulmonary disease, congestive heart failure, cancer, stroke, liver failure, renal failure

Reference category is historical control time period

CI: confidence interval; HR: hazard ratio; OR: odds ratio

Confidential



## Supplementary Material

**Methods.** Additional information regarding data sources and covariates

**Table e1:** ICD-10 codes to identify emergent diagnoses

**Table e2:** Validated algorithms for comorbidities

**Table e3:** Codes to identify other comorbidities/covariates

### METHODS:

#### Data Sources

ED visits were identified from the Canadian Institutes of Health Information National Ambulatory Care Reporting System (CIHI-NACRS). NACRS is an administrative database that contains anonymized, abstracted data on all ED patient visits in the province of Ontario; it contains over 300 data points on every ED visit. Reporting to NACRS is mandatory in Ontario. Data in NACRS are reviewed and errors and/or missing data are identified, and returned to the submitting hospital as necessary for resubmission; therefore, missing data for mandatory variables in NACRS is very low.

#### Study Participants

The main discharge diagnosis in NACRS, which uses ICD-10 codes, was used to identify patients with the diagnoses of interest. See Table e1 for the ICD-10 codes used to identify each of the five emergent diagnoses.

#### Covariates

Where available, validated algorithms were used to identify patient risk factors and comorbidities in the linked databases. See Table e2 for previously validated algorithms to identify comorbidities with ICES data. Where validated algorithms were not available, the patient was considered to have a past medical history of the disease in question if they had, within the 5 years prior to the ED visit, one diagnosis in the DAD, or two outpatient diagnoses in the OHIP databases, or two main diagnoses in NACRS, or one each from NACRS and the OHIP database. This approach is a similar strategy used in many of the validated algorithms. See Table e3 for codes to identify other comorbidities. To identify patients with a history of cancer, the Ontario Cancer Registry (OCR) was used. The OCR is a registry that contain all the diagnosed cases of cancer (except squamous and basal cell carcinoma) in the province. To examine rurality, the Rural Index of Ontario (RIO) score was used. The RIO score is a continuous score calculated by Statistics Canada, and is assigned to each patient based on postal code.<sup>5</sup> The score incorporates: population density, distance to basic referral centre, and distance to advanced referral centre. A higher RIO score is indicative of a more rural area, with scores greater than 40 considered to be rural based on funding models by the Ministry of Health and Long Term Care. The John Hopkins Adjusted Clinical Group (ACG) case-mix system is a measure of patient acuity/comorbidity. Diagnoses are assigned to one of 32 diagnostic cluster (Adjusted Diagnostic Groups (ADG)); patients with the greatest number of high-risk clusters are generally sickest and require the most health care resources. In an ambulatory cohort, the ADG score is similar in principle to the use of Charlson Comorbidity Index in studies of hospitalized patients.

Table e1: ICD-10 codes in the main discharge diagnosis in CIHI-NACRS to identify emergent diagnoses

| Diagnosis           | ICD-10 Code                                                                                                                                                                                                                                                                                                                                                           | Description                                         |
|---------------------|-----------------------------------------------------------------------------------------------------------------------------------------------------------------------------------------------------------------------------------------------------------------------------------------------------------------------------------------------------------------------|-----------------------------------------------------|
| Acute appendicitis  | K35                                                                                                                                                                                                                                                                                                                                                                   | Acute appendicitis                                  |
|                     | K350                                                                                                                                                                                                                                                                                                                                                                  | Acute appendicitis with generalized peritonitis     |
|                     | K351                                                                                                                                                                                                                                                                                                                                                                  | Acute appendicitis with peritoneal abscess          |
|                     | K352                                                                                                                                                                                                                                                                                                                                                                  | Acute appendicitis with generalized peritonitis     |
|                     | K353                                                                                                                                                                                                                                                                                                                                                                  | Acute appendicitis with localized peritonitis       |
|                     | K358                                                                                                                                                                                                                                                                                                                                                                  | Acute appendicitis, other and unspecified           |
|                     | K359                                                                                                                                                                                                                                                                                                                                                                  | Acute appendicitis, unspecified                     |
| Ectopic pregnancy   | O00                                                                                                                                                                                                                                                                                                                                                                   | Ectopic Pregnancy                                   |
|                     | O000                                                                                                                                                                                                                                                                                                                                                                  | Abdominal pregnancy                                 |
|                     | O001                                                                                                                                                                                                                                                                                                                                                                  | Tubal pregnancy                                     |
|                     | O002                                                                                                                                                                                                                                                                                                                                                                  | Ovarian pregnancy                                   |
|                     | O008                                                                                                                                                                                                                                                                                                                                                                  | Other ectopic pregnancy                             |
|                     | O009                                                                                                                                                                                                                                                                                                                                                                  | Ectopic pregnancy, unspecified                      |
| Hyperkalemia        | E875                                                                                                                                                                                                                                                                                                                                                                  | Hyperkalaemia                                       |
| Acute Renal Failure | E102, E112, E132,<br>E142, I12, I13, N01.*,<br>N03.*, N05.*, N08.*,<br>N18.*, N19.*, N25.*<br>with dialysis<br>OHIP: R849, R850,<br>G323, G325, G326,<br>G330, G331, G860,<br>G333, G083, G091,<br>G085, G295, G082,<br>G090, G092, G093,<br>G094, G861, G862,<br>G863, G864, G865,<br>G866, G294, G095,<br>G096 CCP: 51.95,<br>66.98 CCI:<br>1PZ21HQBR,<br>1PZ21HPD4 |                                                     |
| DKA                 | E10.0*                                                                                                                                                                                                                                                                                                                                                                | Type 1 diabetes mellitus with coma                  |
|                     | E10.1*                                                                                                                                                                                                                                                                                                                                                                | Type 1 diabetes mellitus with ketoacidosis          |
|                     | E11.0*                                                                                                                                                                                                                                                                                                                                                                | Type 2 diabetes mellitus with coma                  |
|                     | E11.1*                                                                                                                                                                                                                                                                                                                                                                | Type 2 diabetes mellitus with ketoacidosis          |
|                     | E13.0*                                                                                                                                                                                                                                                                                                                                                                | Other specified diabetes mellitus with coma         |
|                     | E13.1*                                                                                                                                                                                                                                                                                                                                                                | Other specified diabetes mellitus with ketoacidosis |
|                     | E14.0*                                                                                                                                                                                                                                                                                                                                                                | Unspecified diabetes mellitus with coma             |
|                     | E14.1*                                                                                                                                                                                                                                                                                                                                                                | Unspecified diabetes mellitus with ketoacidosis     |
| Cellulitis          | L03*                                                                                                                                                                                                                                                                                                                                                                  | Cellulitis                                          |

**Table e2: Validated algorithms for comorbidities**

| Comorbidity  | Sensitivity % | Specificity % | Reference |
|--------------|---------------|---------------|-----------|
| CAD          | 88.8          | 92.8          | 1         |
| CHF          | 84.8          | 97.0          | 2         |
| COPD         | 57.5          | 95.4          | 3         |
| Diabetes     | 86.0          | 97.0          | 5         |
| Hypertension | 73.0          | 95.0          | 6         |

CAD: coronary artery disease; CHF: congestive heart failure; COPD: chronic pulmonary obstructive disease

**References:**

- 1) Austin PC, Daly PA, Tu JV. A multicenter study of the coding accuracy of hospital discharge administrative data for patients admitted to cardiac care units in Ontario. *Am Heart J.* 2002;144(2):290-296.
- 2) Schultz SE, Rothwell DM, Chen Z, Tu K. Identifying cases of congestive heart failure from administrative data: A validation study using primary care patient records. *Chronic Dis Injuries in Canada.* 2013;33(3):160-6.
- 3) Gershon AS, Wang C, Guan J, Vasilevska-Ristovska J, Cicutto L, To T. Identifying individuals with physician diagnosed COPD in health administrative databases. *COPD.* 2009;6(5):388.
- 4) Jaakkimainen RL, Bronskill SE, Tierney MC, et al. Identification of Physician-Diagnosed Alzheimer's Disease and Related Dementias in Population-Based Administrative Data: A Validation Study Using Family Physicians' Electronic Medical Records. *J Alzheimers Dis.* 2016;54(1):337-349.
- 5) Hux JE, Ivis F, Flintoft V, Bica A. Diabetes in Ontario: determination of prevalence and incidence using a validated administrative data algorithm. *Diabetes Care.* 2002;25(3):512.
- 6) Tu K, Campbell NR, Chen ZL, Cauch-Dudek KJ, McAlister FA. Accuracy of administrative databases in identifying patients with hypertension. *Open Medicine.* 2007;1(1):e18.

**Table e3. Codes to identify other comorbidities/covariates**

| Comorbidity           | ICD-10 DX10CODE                          | OHIP DXCODE   |
|-----------------------|------------------------------------------|---------------|
| Cancer (last 5 years) | OCR                                      | OCR           |
| Renal Failure         | N01.*, N03.*, N05.*, N18.*, N19.*,       | 585, 584      |
| Liver Failure         | K70.4, K72.1, K72.9, K76.6, K76.7,       | 571           |
| Stroke                | I63.*, I64.*, H34.*                      | 436, 437      |
| CAD                   | I20.*, I21.*, I22.*, I23.*, I24.*, I25.* | 410, 412, 413 |

OCR: Ontario Cancer Registry; ALR: Activity Level Reporting database; NDFP = New Drug Funding Program database

Confidential
